# Supplementary material for: Steric effects stabilize reverse micelle domains in supercritical CO2 by determined conformation: restrictions of water and cations
Source: Royal Society of Chemistry journal article supplement (doi:10.1039/d3me00115f), 2023-09-12
Supplement: d3me00115f1.pdf [file d3me00115f1.pdf]

## Supporting Information

# Steric Effect Stabilize Reverse Micelles Domains in Supercritical CO<sub>2</sub> by Determined Conformation: Restrictions of Water and Cations

Huiwen Sun<sup>a</sup>, Meng Wang<sup>a</sup>, Pan Wang<sup>a</sup>, and Muhan Wang<sup>a, b, c\*</sup>

a. Department of Civil Engineering, Qingdao University of Technology, Qingdao 266033, China.

b. State Key Laboratory of Hydraulic Engineering Simulation and Safety, Tianjin University,  
Tianjin 300072, China

c. School of Materials Science and Engineering, China University of Petroleum, Qingdao 266580,  
China;

\* Corresponding author, Muhan Wang. Email: [wangmuhan@qut.edu.cn](mailto:wangmuhan@qut.edu.cn)

**TABLE S1. The parameters of SPC/E and EPM2 models**

|                             | H <sub>2</sub> O, SPC/E type |         | CO <sub>2</sub> , EPM2 type |         |
|-----------------------------|------------------------------|---------|-----------------------------|---------|
| q (e)                       | H                            | 0.4238  | C                           | 0.6512  |
|                             | O                            | -0.8476 | O                           | -0.3256 |
| $\epsilon_{ij}$ (kcal/mole) | O-O                          | 0.1553  | C-C                         | 0.0559  |
|                             | H-H, H-O                     | 0       | O-O                         | 0.1599  |
|                             |                              |         | C-O                         | 0.0946  |
| $\sigma_{ij}$ (Å)           | O-O                          | 3.166   | C-C                         | 2.757   |
|                             |                              |         | O-O                         | 3.033   |
|                             |                              |         | C-O                         | 2.892   |
| $r_0$ (Å)                   | H-O                          | 1.0     | C-O                         | 1.149   |
| $\theta_0$ (deg)            | H-O-H                        | 109.47  | O-C-O                       | 180     |

The functional form of the COMPASS force field is:

$$\begin{aligned}
 E_{\text{total}} &= \sum_b [k_2(b - b_o)^2 + k_3(b - b_o)^3 + k_4(b - b_o)^4] + \sum_{\theta} [k_2(\theta - \theta_o)^2] \\
 &+ \sum_{\phi} [k_1(1 - \cos \phi) + k_2(1 - \cos 2\phi) + k_3(1 - \cos 3\phi)] + \sum_x k_2 \chi^2 + \sum_{b,b'} k(b - b_o)(b - b_o') \\
 &+ \sum_{b,\theta} k(b - b_o)(\theta - \theta_o) + \sum_{b,\phi} (b - b_o)[k_1 \cos \phi + k_2 \cos 2\phi + k_3 \cos 3\phi] \\
 &+ \sum_{\theta,\phi} (\theta - \theta_o)[k_1 \cos \phi + k_2 \cos 2\phi + k_3 \cos 3\phi] + \sum_{b,\theta'} k(\theta - \theta_o) + \sum_{\theta,\phi} k(\theta - \theta_o)(\theta' - \theta_o') \cos \phi \\
 &+ \sum_{i,j} \frac{q_i q_j}{r_{ij}} + \sum_{i,j} \epsilon_{ij} \left[ 2 \left( \frac{r_{ij}^{\circ}}{r_{ij}} \right)^9 - 3 \left( \frac{r_{ij}^{\circ}}{r_{ij}} \right)^6 \right]
 \end{aligned}$$

The force field parameters of the fluorine atom are shown in **Table S2**.

**TABLE S2. COMPASS force field parameter values for fluorine and carbon atoms**

| Bond                             | $b_0(\text{\AA})$             | $k_{b,2}(\text{kcal/mol} \cdot \text{\AA}^2)$                    | $k_{b,3}(\text{kcal/mol} \cdot \text{\AA}^3)$      | $k_{b,4}(\text{kcal/mol} \cdot \text{\AA}^4)$      |
|----------------------------------|-------------------------------|------------------------------------------------------------------|----------------------------------------------------|----------------------------------------------------|
| <i>CC</i>                        | 1.530                         | 299.670                                                          | -501.77                                            | 679.81                                             |
| <i>CH</i>                        | 1.101                         | 345.000                                                          | -691.89                                            | 844.60                                             |
| <i>CF</i>                        | 1.390                         | 403.032                                                          | 0                                                  | 0                                                  |
| Angle                            | $\theta_0(\text{deg})$        | $k_{\theta,2}(\text{kcal/mol} \cdot \text{rad}^2)$               | $k_{\theta,3}(\text{kcal/mol} \cdot \text{rad}^3)$ | $k_{\theta,4}(\text{kcal/mol} \cdot \text{rad}^4)$ |
| <i>CCC</i>                       | 112.67                        | 39.5160                                                          | -7.4430                                            | -9.5583                                            |
| <i>CCH</i>                       | 110.77                        | 41.4530                                                          | -10.6040                                           | 5.1290                                             |
| <i>HCH</i>                       | 107.66                        | 39.6410                                                          | -12.9210                                           | -2.4318                                            |
| <i>CCF</i>                       | 109.20                        | 68.3715                                                          | 0                                                  | 0                                                  |
| <i>FCF</i>                       | 109.10                        | 71.9700                                                          | 0                                                  | 0                                                  |
| Torsion                          | $k_{\phi,1}(\text{kcal/mol})$ | $k_{\phi,2}(\text{kcal/mol})$                                    | $k_{\phi,3}(\text{kcal/mol})$                      |                                                    |
| <i>CCCC</i>                      | 0                             | 0.0514                                                           | -0.1430                                            |                                                    |
| <i>CCCH</i>                      | 0                             | 0.0316                                                           | -0.1681                                            |                                                    |
| <i>CCCF</i>                      | 0                             | 0                                                                | 0.1500                                             |                                                    |
| <i>HCCF</i>                      | -0.1432                       | 0.0617                                                           | -0.1530                                            |                                                    |
| <i>FCCF</i>                      | 0                             | 0                                                                | -0.1                                               |                                                    |
| bond/bond                        |                               | $k_{bb}(\text{kcal/mol} \cdot \text{\AA}^2)$                     |                                                    |                                                    |
| <i>CC/CH</i> (first neighboring) |                               | 3.3872                                                           |                                                    |                                                    |
| <i>CH/CH</i> (first neighboring) |                               | 5.3316                                                           |                                                    |                                                    |
| <i>CC/CC</i> (first neighboring) |                               | 0                                                                |                                                    |                                                    |
| bond/angle                       |                               | $k_{b\theta}(\text{kcal/mol} \cdot \text{\AA} \cdot \text{rad})$ |                                                    |                                                    |
| C-C/C-C-C                        |                               | 8.016                                                            |                                                    |                                                    |
| C-C/C-C-H                        |                               | 20.754                                                           |                                                    |                                                    |
| C-H/C-C-H                        |                               | 11.421                                                           |                                                    |                                                    |

|                                |                                                       |                                     |                                     |
|--------------------------------|-------------------------------------------------------|-------------------------------------|-------------------------------------|
| C-H/H-C-H                      | 18.103                                                |                                     |                                     |
| angle/angle                    | $k_{\theta\theta}$ (kcal/mol · rad <sup>2</sup> )     |                                     |                                     |
| C-C-C/C-C-C                    | -0.1729                                               |                                     |                                     |
| C-C-C/C-C-H                    | -1.3199                                               |                                     |                                     |
| H-C-C/C-C-H                    | -0.4825                                               |                                     |                                     |
| angle/angle/torsional          | $k_{\theta\theta\phi}$ (kcal/mol · rad <sup>2</sup> ) |                                     |                                     |
| C-C-C/C-C-C/C-C-C-C            | -22.045                                               |                                     |                                     |
| C-C-C/C-C-H/C-C-C-H            | -16.164                                               |                                     |                                     |
| H-C-C/C-C-H/H-C-C-H            | -12.564                                               |                                     |                                     |
| Bond/torsion                   | $k_{b\phi,1}$ (kcal/mol · Å)                          | $k_{b\phi,2}$ (kcal/mol · Å)        | $k_{b\phi,3}$ (kcal/mol · Å)        |
| C-C/C-C-C-C<br>(central bond)  | -17.787                                               | -7.1877                             | 0                                   |
| C-C/C-C-C-H<br>(central bond)  | -14.879                                               | -3.6581                             | -0.3138                             |
| C-C/H-C-C-H<br>(central bond)  | -14.261                                               | -0.5322                             | -0.4864                             |
| C-C/C-C-C-C<br>(terminal bond) | -0.0732                                               | 0                                   | 0                                   |
| C-C/C-C-C-H<br>(terminal bond) | 0.2486                                                | 0.2422                              | -0.0925                             |
| C-H/C-C-C-H<br>(terminal bond) | 0.0814                                                | 0.0591                              | 0.2219                              |
| C-H/H-C-C-H<br>(terminal bond) | 0.2130                                                | 0.3120                              | 0.0777                              |
| angle/torsion                  | $k_{\theta\phi,1}$ (kcal/mol · rad)                   | $k_{\theta\phi,2}$ (kcal/mol · rad) | $k_{\theta\phi,3}$ (kcal/mol · rad) |
| C-C-C/C-C-C-C                  | 0.3886                                                | -0.3139                             | 0.1389                              |

|               |                      |                   |         |
|---------------|----------------------|-------------------|---------|
| C-C-C/C-C-C-H | -0.2454              | 0                 | -0.1136 |
| C-C-H/C-C-C-H | 0.3113               | 0.4516            | -0.1988 |
| H-C-C/H-C-C-H | -0.8085              | 0.5569            | -0.2466 |
| atom atom     | $\epsilon(kcal/mol)$ | $r_0(\text{\AA})$ |         |
| <i>CC</i>     | 0.0400               | 3.854             |         |
| <i>HH</i>     | 0.0230               | 2.878             |         |
| <i>FF</i>     | 0.0598               | 3.200             |         |
| <i>CH</i>     | 0.0215               | 3.526             |         |
| <i>CF</i>     | 0.0422               | 3.600             |         |
| atom atom     | $q_1(e)$             | $q_2(e)$          |         |
| <i>CC</i>     | 0                    | 0                 |         |
| <i>CH</i>     | -0.053               | +0.053            |         |
| <i>CF</i>     | +0.25                | -0.25             |         |

More public version parameters of the COMPASS force field can be obtained from the web page(  
[https://github.com/lammps/lammps/blob/develop/tools/msi2lmp/frc\\_files/compass\\_published.frc](https://github.com/lammps/lammps/blob/develop/tools/msi2lmp/frc_files/compass_published.frc)  
 )

**TABLE S3. The density of scCO<sub>2</sub> after the end of the NPT ensemble in four surfactant system**

| system                       | F7H7   | PFPE   | di-HCF4 | AOK    | Experimental value |
|------------------------------|--------|--------|---------|--------|--------------------|
| density (g/cm <sup>3</sup> ) | 0.7997 | 0.7258 | 0.8227  | 0.7258 | 0.8314             |

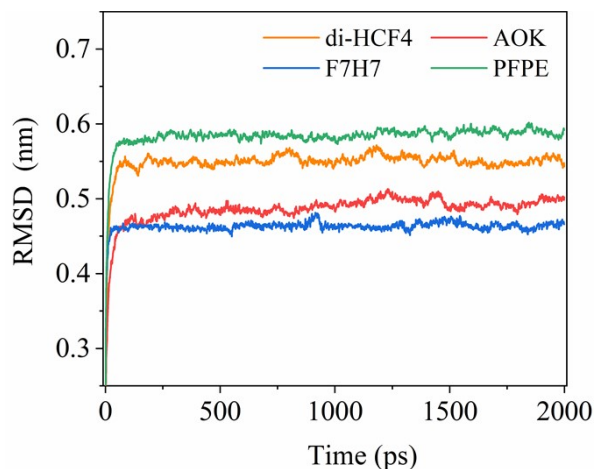

**Figure S1.** Root Mean Square Deviation (RMSD) of four surfactants reverse micellar systems.

The root mean square deviation (RMSD) of the reverse micelles was calculated over the final 2 ns of simulation time. The smooth RMSD curves observed during this period indicate that the system had reached equilibrium, with no significant changes in the micellar configuration. This provides evidence that our pre-assembled system achieved equilibrium and ensures the reliability and accuracy of the subsequent data analysis in our study.

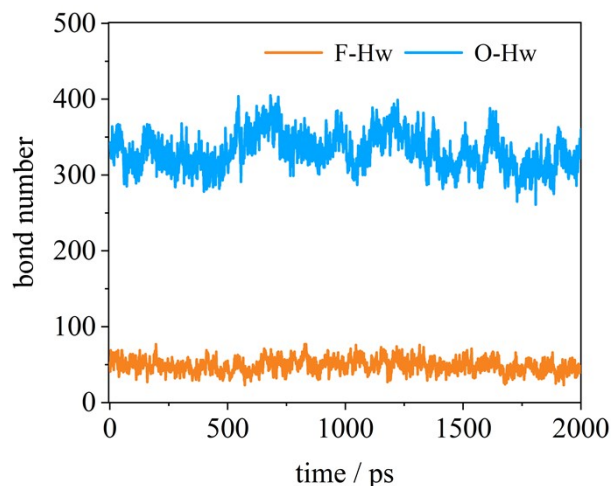

**Figure S2.** Time evolution of the number of bonds in the F7H7 surfactant molecule.

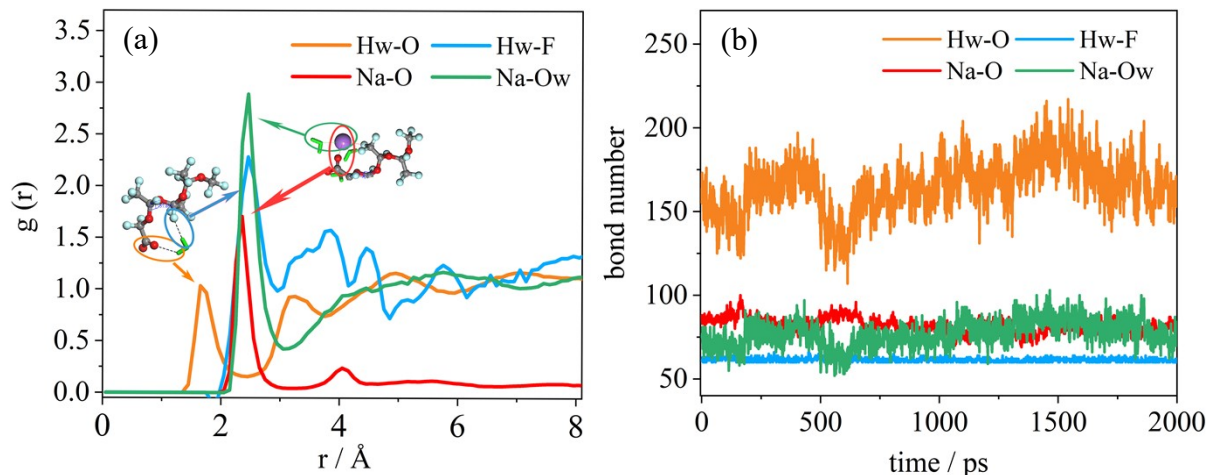

**Figure S3.** (a) Radial Distribution Function (RDF) of Hw-O (oxygen from PFPE surfactant) , Hw (hydrogen from water molecular) -F, Na-O, and Na-Ow (oxygen from water molecular) . (b) Time evolution of the number of bonds in the PFPE surfactant molecule.

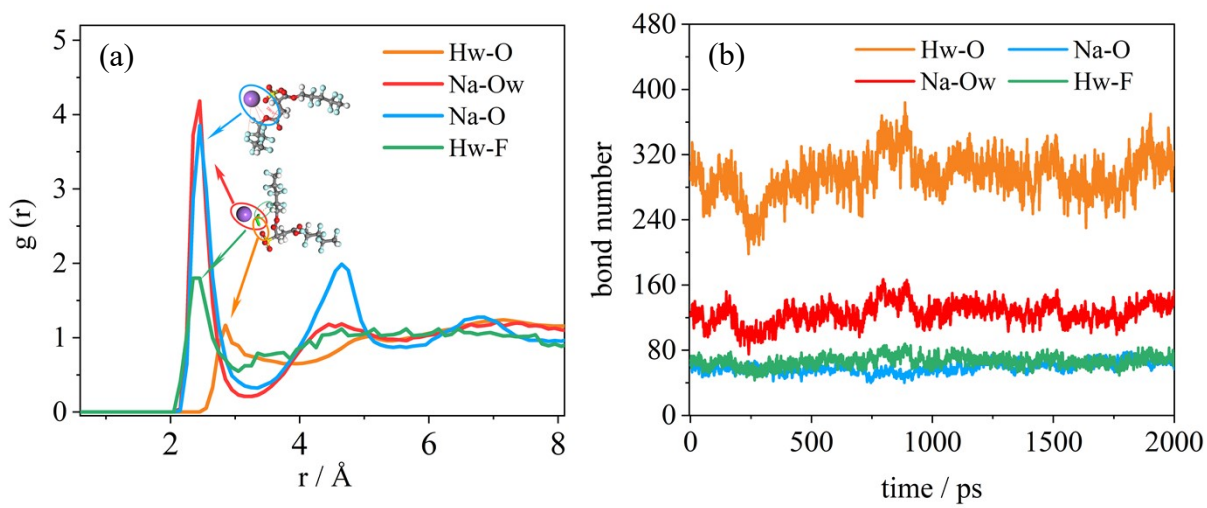

**Figure S4.** (a) Radial Distribution Function (RDF) of Hw-O (oxygen from di-HCF4 surfactant), Na-Ow and Na-O. (b) Time evolution of the number of bonds in the PFPE surfactant molecule.

**Fi**

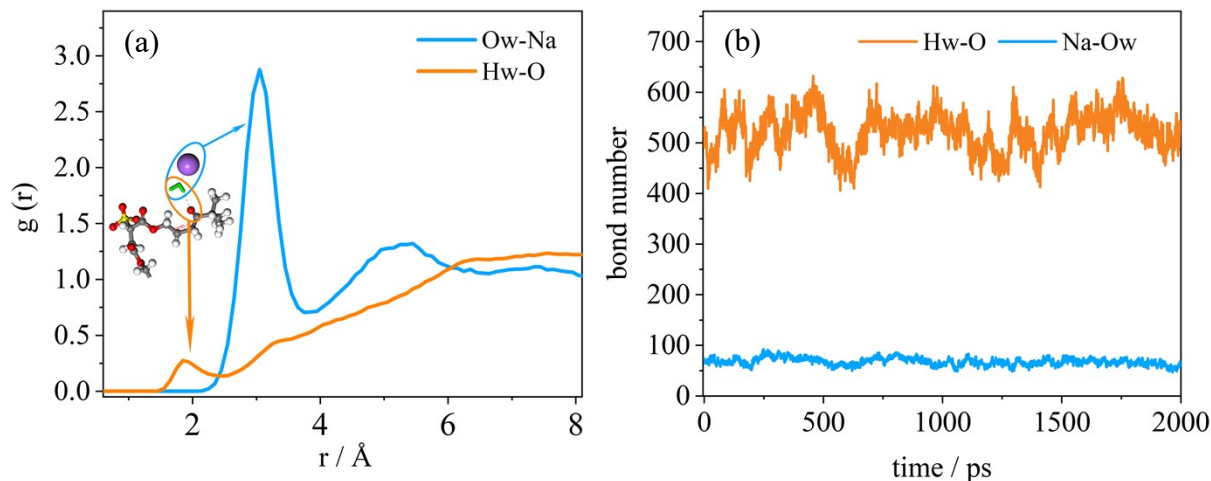

**Figure S5.** Radial Distribution Function (RDF) of Ow–Na (oxygen from water molecular) and Na–O (oxygen from AOK surfactant). (b) Time evolution of the number of bonds in the AOK surfactant molecule.

By analyzing the results presented in **Figure S2** to **Figure S5**, it is evident that hydrogen bonds are formed between water molecules and sodium ions with the surfactant molecules. This conclusion is supported by the calculations of the specific atom interactions between water molecules, sodium ions, and surfactant molecules. The findings highlight the presence of these hydrogen bonds and their role in the molecular interactions within the system, further contributing to our understanding of the surfactant behavior in the studied environment.

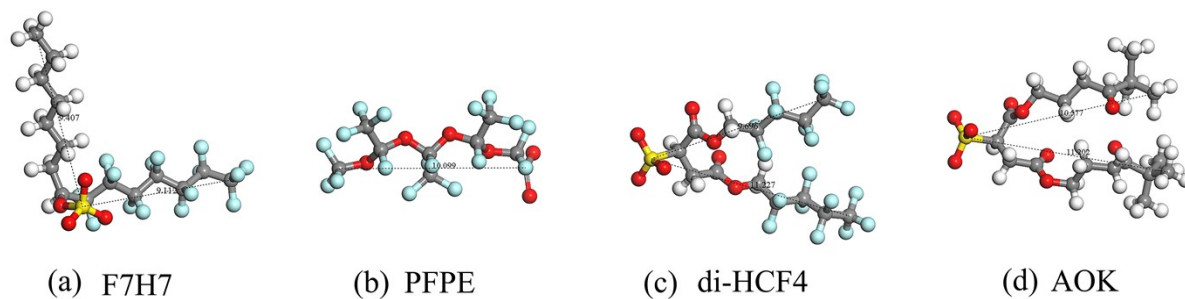

**Figure S6.** The optimized structures and chain lengths of four surfactant single molecules.



- (1) Berendsen, H. J. C.; Grigera, J. R.; Straatsma, T. P. The Missing Term in Effective Pair Potentials. *J. Phys. Chem.* **1987**, *91* (24), 6269–6271.
- (2) J. G. Harris and K. H. Yung, Carbon dioxide’s liquid-vapor coexistence curve and critical properties as predicted by a simple molecular model, *J. Phys. Chem.*, **1995**, *99*, 12021–12024.
- (3) Savin, A. V; Mazo, M. A. The COMPASS Force Field: Validation for Carbon Nanoribbons. *Phys. E Low-dimensional Syst. Nanostructures* **2020**, *118*, 113937.
